# Supplementary material for: Screening with an NMNAT2-MSD platform identifies small molecules that modulate NMNAT2 levels in cortical neurons
Source: PubMed Central journal article supplement (PMC5358788; doi:10.1038/srep43846), 2017-03-07
Supplement: srep43846-s1.pdf [file srep43846-s1.pdf]

**Supplementary Information**

**Title: Screening with an NMNAT2-MSD platform identifies small molecules that modulate NMNAT2 levels in cortical neurons.**

**Authors: Yousuf O. Ali<sup>1-4\*</sup>, Gillian Bradley<sup>1,5</sup>, Hui-Chen Lu<sup>1-5\*</sup>**

## Supplementary Figure Legends

**Figure S1. NMNAT2-MSD platform detects NMNAT2 in specific manner.** Three control experiments were conducted to demonstrate the specificity of this assay. A) Minimal MSD signals were acquired with increasing concentrations of NMNAT1 recombinant protein. B) Low MSD signals were acquired when NeuN antibody was used as capture antibody and Ab56980 antibody as detection antibody to detect NMNAT2 proteins. C) MSD signals reached plateau when a very high amount of NMNAT2 protein was used.

**Figure S2.** Optimization of Ab56890 and Ab110040 antibody formulation improves signal to noise ratio for detecting NMNAT2. The new antibodies were concentrated to 1mg/ml and were free of any additives.

**Figure S3.** Layout and plating scheme of LOPAC compounds for application into 96 well plate containing cultured neurons. (A) Layout of a 96-well plate treatment format for LOPAC drugs. Intermediate plates contained 100ul of 50uM LOPAC drugs to be applied in duplicate plates to account for interplate variability. 25ul of drug solutions were then added to neuronal cultures plated in the same format into 100ul Neurobasal media, yielding a final concentration of 10uM ( $V_t=125$  ul). B) Scheme for making intermediate drug plates from Medchem plates (which contained original LOPAC drugs at 10mM concentration).

**Figure S4.** Western Analysis of the dose dependent effects of NMNAT2 positive modulators on endogenous neuronal NMNAT2 levels in WT cortical neurons. DIV14 WT neurons were treated with indicated concentrations of the drugs for 6 hours. The lysates were, separated by SDS-PAGE, transferred to nitrocellulose membranes, and probed for

NMNAT2 using the 2G8 antibody. NMNAT2 immunoreactivity was normalized to MAP2 signals (a neuronal marker). Levels of NMNAT2 were expressed as fold change relative to the DMSO control.

**Figure S5.** Western Analysis of the dose dependent effects of NMNAT2 negative modulators on endogenous neuronal NMNAT2 levels in WT cortical neurons. DIV14 WT neurons were treated with indicated concentration of the drug for 6 hours and analyzed as in **Figure S4**.

**Figure S6.** MTT assay to determine neuronal survival after a 6 hr treatment with various NMNAT2 negative modulators. Only etoposide and gossypol reduced cell viability following a 6 hr treatment at 10uM concentration.

**Figure S7.** Raw Blots for figure 4.

**Figure S8.** Quantitative RT-PCR to determine the impacts of drug treatment on *nmnat2* mRNA level. WT cortical neurons were treated with 10 $\mu$ M of each drug for 6 hrs and total RNA were extracted for qPCR experiments (please see Methods). *nmnat2* mRNA levels were normalized to GAPDH loading control and plotted as fold change to DMSO control. MG132 is a proteasome inhibitor. For MSD assay, it was used as a positive control to increase NMNAT2 protein level because it reduces the degradation of NMNAT2 by proteasome. Here we show that MG132 treatment has no impact on *nmnat2* mRNA abundance. \* $p < 0.05$

**Table S1.** List of Commercial NMNAT2 antibodies tested in our study.

**Table S2.** List of 37 compounds identified by NMNAT2-MSD screen name, simplified descriptions of their actions, NMNAT2 fold changes detected by MSD, and NMNAT2 fold changes detected by Western analysis. Drugs that showed a consistent impact on NMNAT2 levels are labeled in blue, while compounds with inconsistent changes are labeled in grey. The rest are in black. Note the fold change shown is from drug treatment at 10uM concentration for 6 hours. The drug functional description is adapted from the LOPAC library annotations. Blue compounds that are highlighted in yellow identify those that significantly affected NMNAT2 levels at a concentration  $\leq 2.5 \mu\text{M}$ .

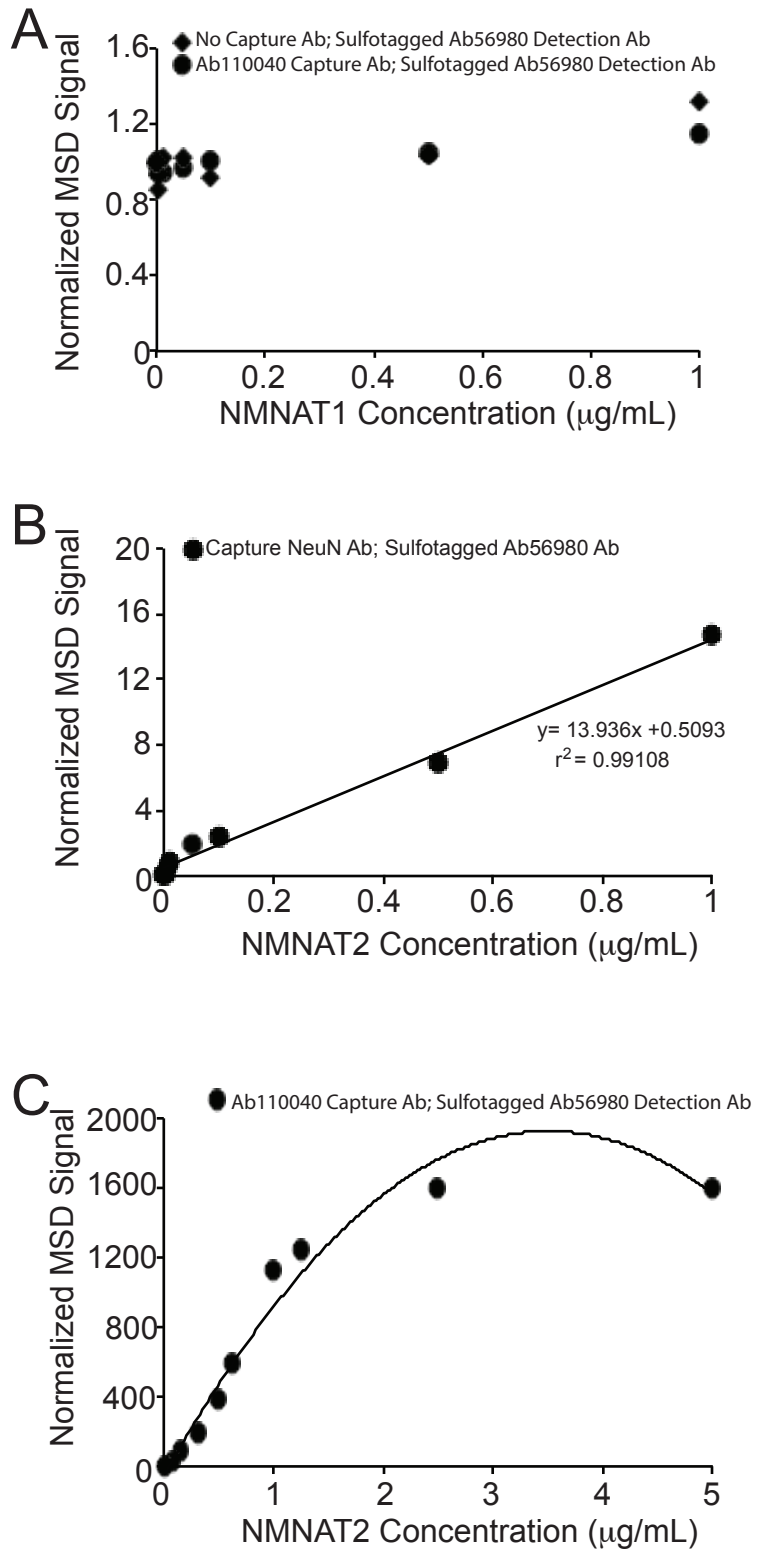

Figure S1

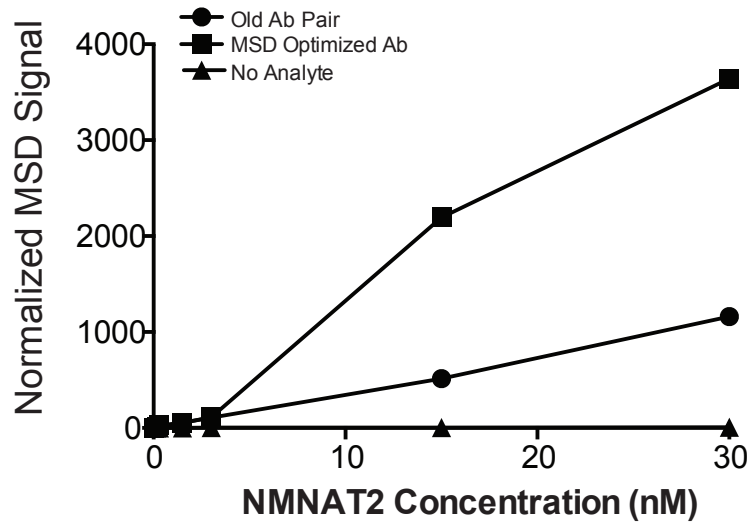

Figure S2

A

|    | LOPAC Compounds |     |     |     |     |     |     |     | Neg. Control | Pos. Control |    |
|----|-----------------|-----|-----|-----|-----|-----|-----|-----|--------------|--------------|----|
| XX | XX              | XX  | XX  | XX  | XX  | XX  | XX  | XX  | XX           | XX           | XX |
| XX | D1              | D2  | D3  | D4  | D5  | D6  | D7  | D8  | DMSO         | MG132        | XX |
| XX | D9              | D10 | D11 | D12 | D13 | D14 | D15 | D16 | DMSO         | MG132        | XX |
| XX | D17             | D18 | D19 | D20 | D21 | D22 | D23 | D24 | DMSO         | MG132        | XX |
| XX | D25             | D26 | D27 | D28 | D29 | D30 | D31 | D32 | DMSO         | MG132        | XX |
| XX | D33             | D34 | D35 | D36 | D37 | D38 | D39 | D40 | DMSO         | MG132        | XX |
| XX | D41             | D42 | D43 | D44 | D45 | D46 | D47 | D48 | DMSO         | MG132        | XX |
| XX | XX              | XX  | XX  | XX  | XX  | XX  | XX  | XX  | XX           | XX           | XX |

B

|                                                                                                                                                                                                                                                                                                                                                                                                                                                                                     |
|-------------------------------------------------------------------------------------------------------------------------------------------------------------------------------------------------------------------------------------------------------------------------------------------------------------------------------------------------------------------------------------------------------------------------------------------------------------------------------------|
| <p><b>Medchem plate preparation:</b></p> <ol style="list-style-type: none"> <li>1. 20 ul of each compound from library's titer tubes were transferred into respective medchem plates.</li> <li>2. Additionally, 20 uL of DMSO was added into each well, thus diluting compounds from 10mM to 5 mM as 40 uL offers better coverage of bottom of each well. This will ensure that robot tips will aspirate the expected amount.</li> <li>3. DMSO was added into column 10.</li> </ol> |
| <p><b>Intermediate Plate Preparation:</b></p> <ol style="list-style-type: none"> <li>1. 3 uL of each compound will be delivered into 297 ul of media and mixed, diluting 100-X further to 50 uM.</li> <li>2. MG132 Intermediate Solution was added directly into column 11 of intermediate plate to be certain there is no precipitation problem.</li> </ol>                                                                                                                        |
| <p><b>Cell Plate Preparation:</b></p> <ol style="list-style-type: none"> <li>1. 25 uL from each intermediate dilution from intermediate plate will be transferred into cells containing 100 uL media.</li> <li>2. This will be the last dilution (5X) resulting in a final 10 uM compound concentration.</li> </ol>                                                                                                                                                                 |

Figure S3

# Western: NMNAT2 Level after 6h Treatment

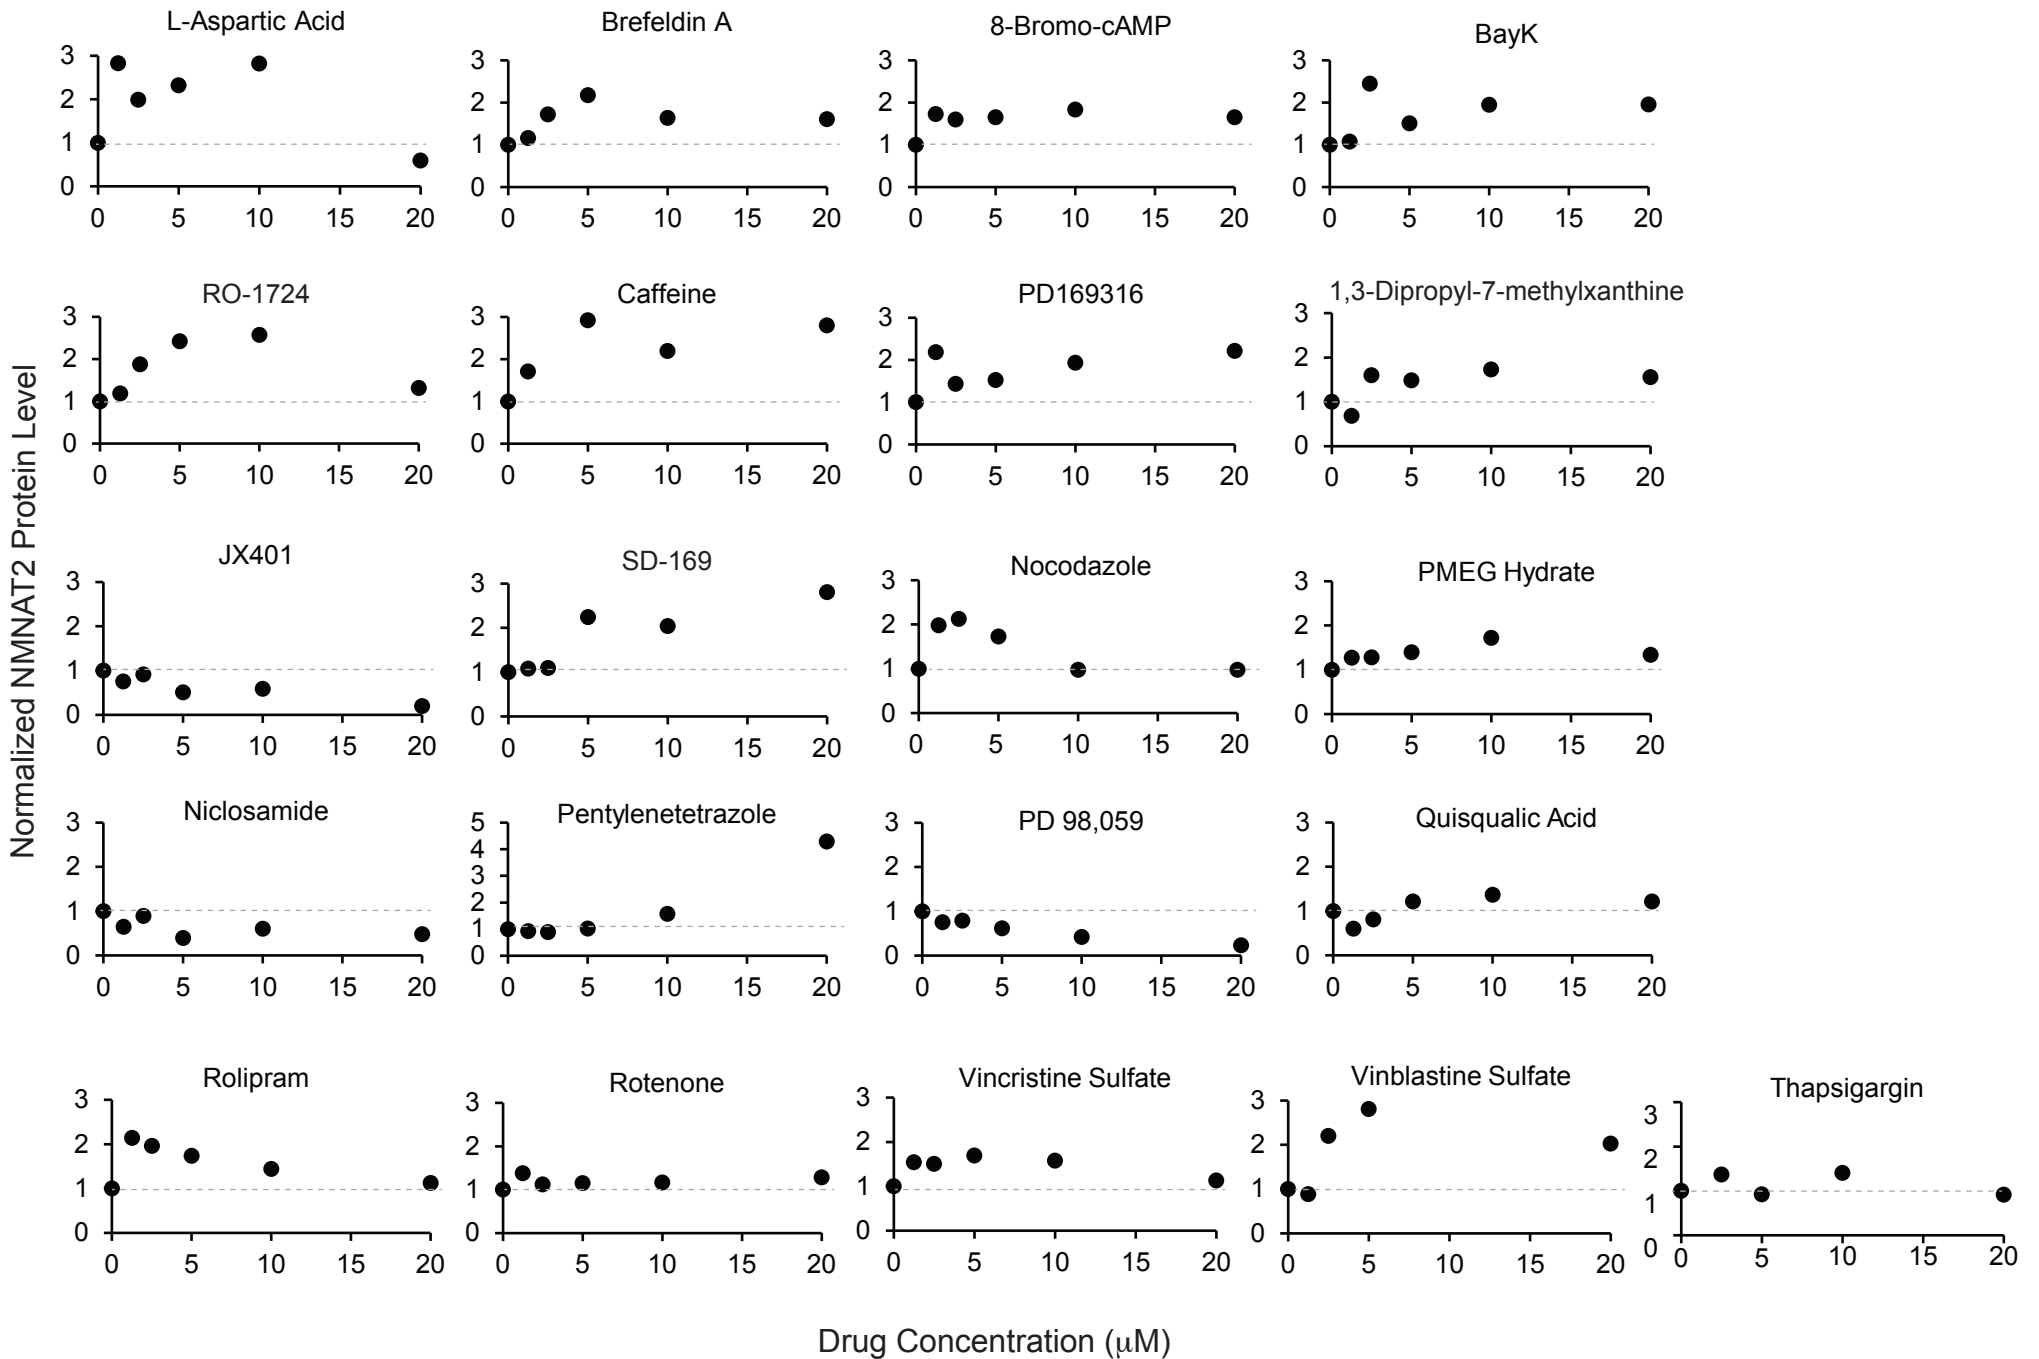

Figure S4



### Western: NMNAT2 Level after 6h Treatment

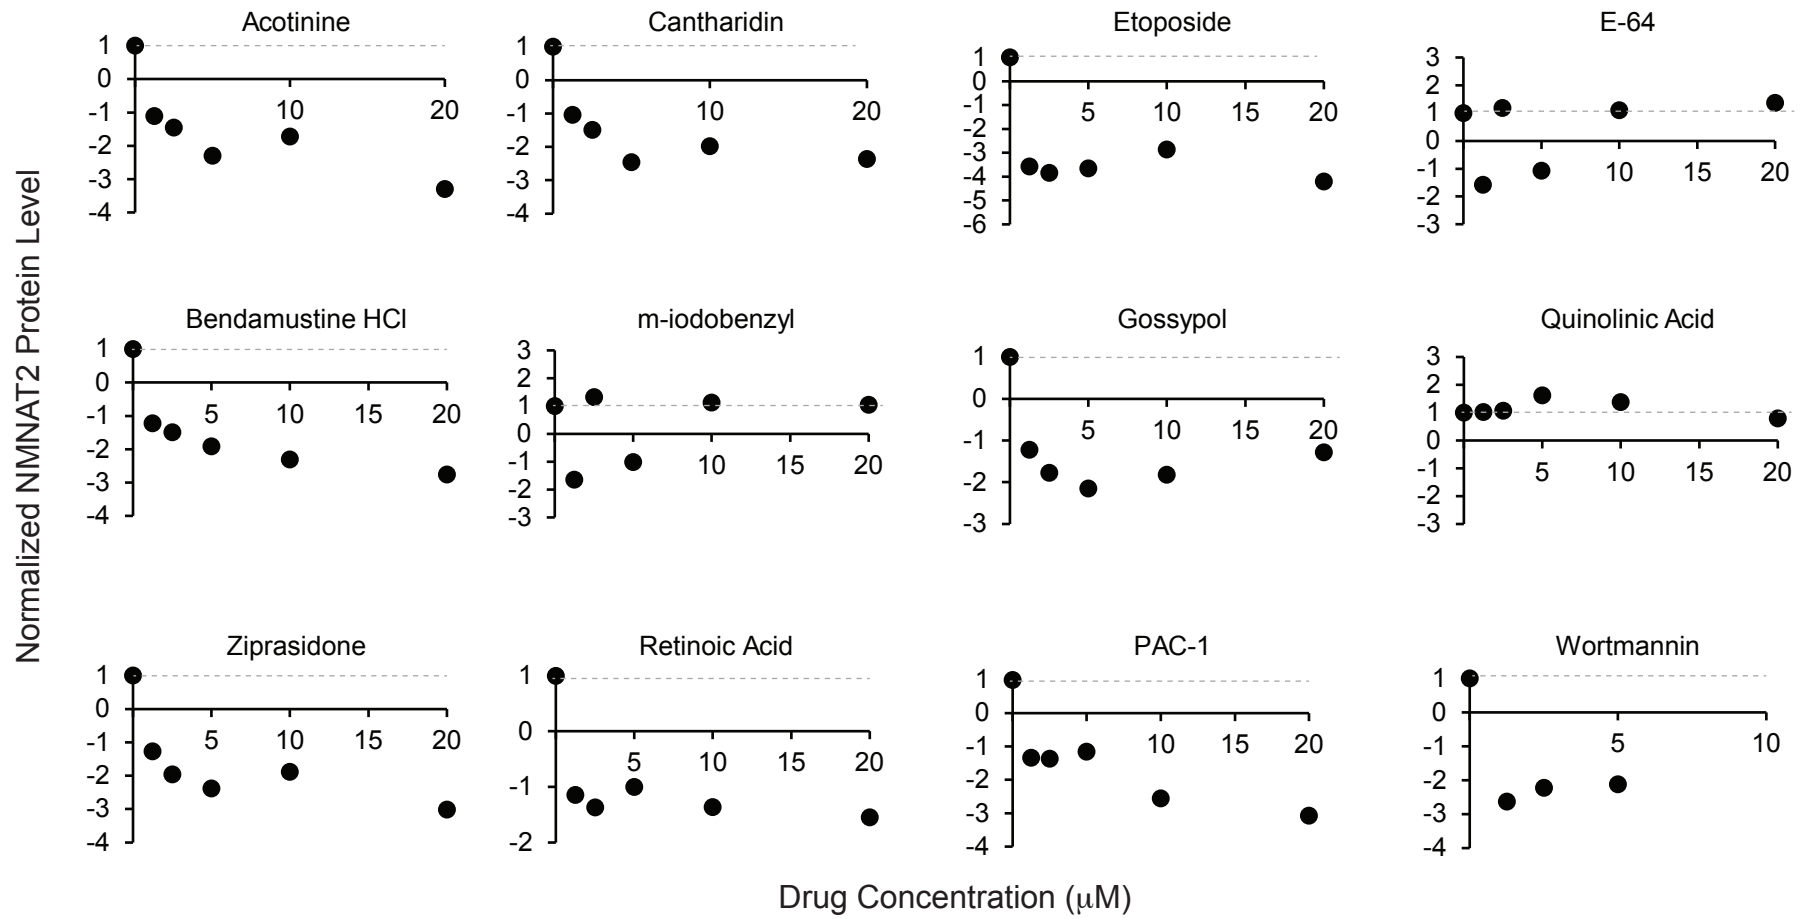

Figure S5

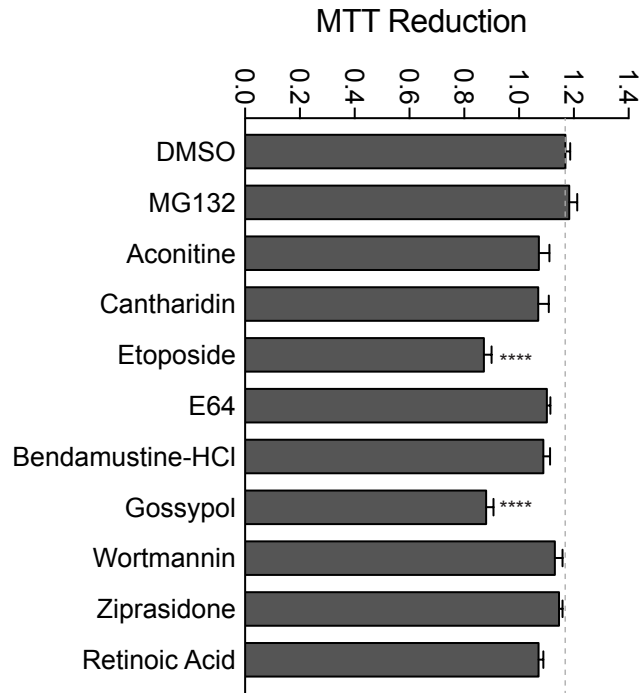

Figure S6

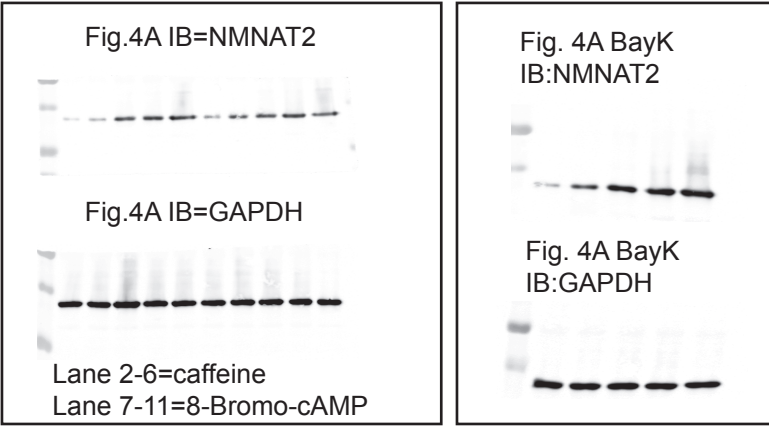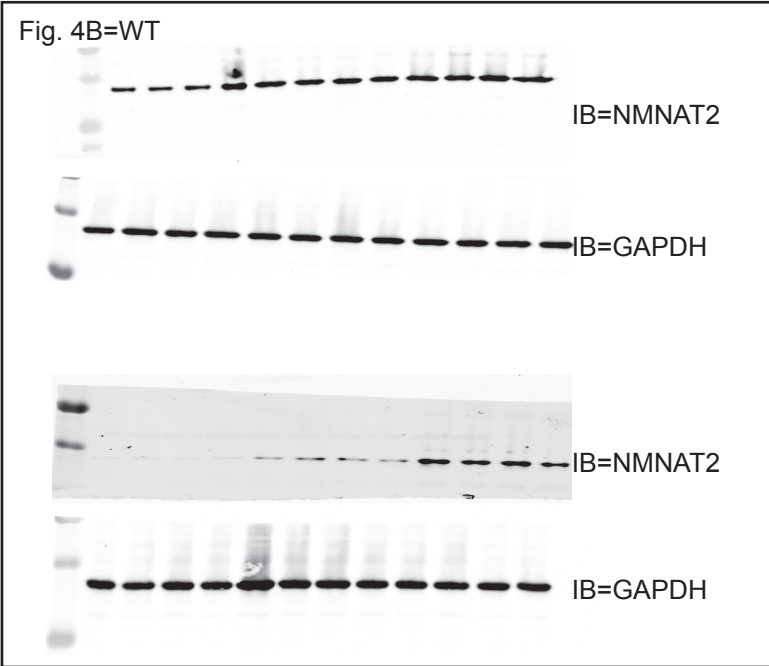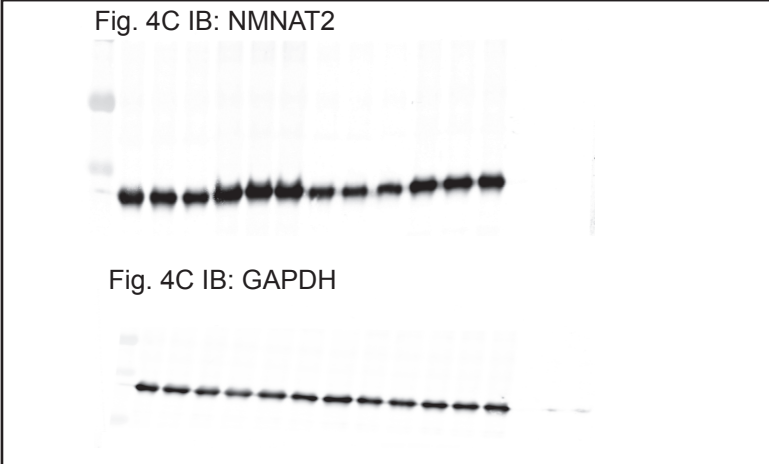

Figure S7

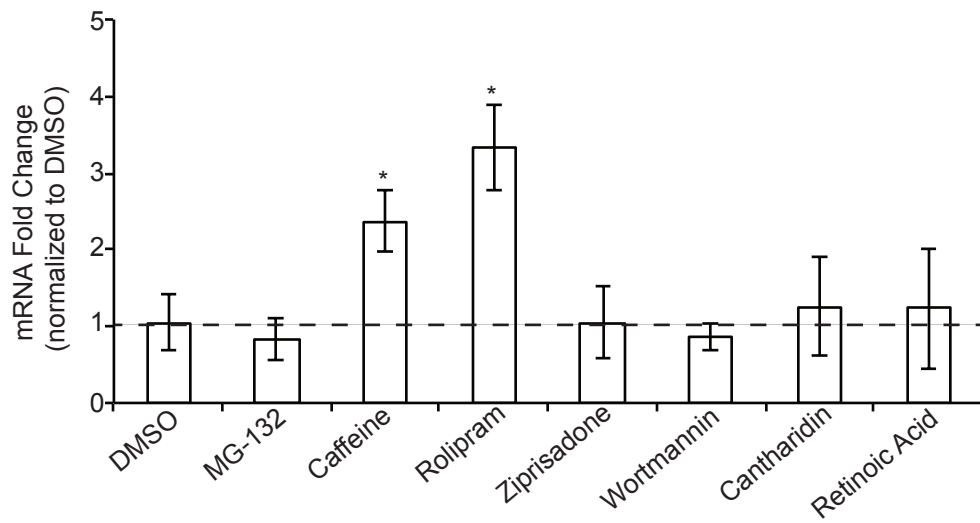

Figure S8
